# Supplementary material for: Statistical methods for exploring spontaneous adverse event reporting databases for drug-host factor interactions
Source: Springer Nature journal article supplement (doi:10.1186/s12874-023-01885-w), 2023-03-27
Supplement: MOESM1 [file 24737424]

**Appendix**  
**Statistical methods for exploring spontaneous adverse event reporting**  
**databases for drug-host factor interactions**

Zhiyuan Lu, Ayako Suzuki, Dong Wang

## Appendix

Table A.1: The MedDRA (Medical Dictionary for Regulatory Activities) preferred terms used to define liver toxicity (George et al. 2018; Suzuki et al. 2015). If any report contains one of the terms listed in the table as the adverse event, the patient is considered to have experienced liver toxicity.

|                                      |                                    |
|--------------------------------------|------------------------------------|
| Blood alkaline phosphatase increased | Blood bilirubin increased          |
| Transaminases increased              | Alanine aminotransferase increased |
| Aspartate aminotransferase increased | Hepatitis toxic                    |
| Hepatitis                            | Acute hepatic failure              |
| Hepatic failure                      | Hepatic function abnormal          |
| Cholestatic liver injury             | Hyperbilirubinaemia                |
| Jaundice                             | Liver function test abnormal       |
| Urine bilirubin increased            | Hepatitis fulminant                |
| Hepatotoxicity                       | Hepatocellular injury              |
| Hepatitis acute                      | Hepatic enzyme increased           |
| Yellow skin                          | Bilirubin conjugated increased     |
| Cholestasis                          | Liver injury                       |
| Hepatic necrosis                     | Urobilinogen urine increased       |
| Hepatic enzyme abnormal              | Ocular icterus                     |
| Hypertransaminasaemia                | Jaundice cholestatic               |
| Alanine aminotransferase abnormal    | Hepatitis cholestatic              |
| Coma hepatic                         | Mixed liver injury                 |
| Subacute hepatic failure             | Bilirubin urine                    |
| Blood bilirubin abnormal             | Liver transplant                   |
| Aspartate aminotransferase abnormal  | Drug-induced liver injury          |
| Blood alkaline phosphatase abnormal  | Hepatorenal failure                |
| Transaminases abnormal               | Reye's syndrome                    |
| Hepatorenal syndrome                 | Hepatic infiltration eosinophilic  |
| Cholestatic pruritus                 | Jaundice hepatocellular            |
| Total bile acids increased           | Glutamate dehydrogenase increased  |
| Icterus index increased              | Bilirubin conjugated abnormal      |
| 5'nucleotidase increased             |                                    |

## Simulation results for age

In Tables A.2-A.4, we present simulation results when the population is divided by age group (above or up to 50 years old) rather than sex. The simulation settings are very similar to those for sex. One difference is on the cutoff points for sample size categories. After processing and filtering the data to obtain count tables with satisfactory numbers for different age groups, we are left with 739 different AEs. With the values 8874 and 20880 being the 25% and 50% quantiles of the  $n_i$ 's, we divided the AEs into three categories depending on the size of  $n_i$ . The  $n_i$ 's within the intervals  $(0, 8874]$ ,  $(8874, 20880]$ , and  $(20880, \infty)$  are considered to be of “small”, “moderate”, and “large” count sizes, respectively. Simulations then follow the procedure for those regarding sex. The performance of different inference methods also parallels that observed in simulations regarding sex.

Table A.2: False discovery rate (FDR) for the likelihood ratio test (LRT), normal approximation, proportional reporting ratio (PRR), and reporting odds ratio (ROR) while using either Max-Stat or Benjamini-Hochberg (BH) method for adjustment of multiple testing when all null hypotheses are true. The inference methods were applied at  $\alpha = 0.05$ . The result is based on 500,000 simulation runs based on the FAERS dataset regarding age for different sample sizes when there is no difference between age groups ( $\Delta = 0$ ).

| Method   | $n_i$ size | LRT    | Normal approx. | PRR   | ROR   |
|----------|------------|--------|----------------|-------|-------|
| BH       | small      | 0.0371 | 0.0445         | 0.162 | 0.112 |
|          | medium     | 0.0375 | 0.0438         | 0.209 | 0.141 |
|          | large      | 0.0466 | 0.0451         | 0.458 | 0.303 |
| Max-Stat | small      | 0.0472 | 0.0440         | 0.160 | 0.110 |
|          | medium     | 0.0480 | 0.0431         | 0.206 | 0.140 |
|          | large      | 0.0492 | 0.0446         | 0.451 | 0.299 |

Table A.3: Sensitivity and false discovery rate (FDR) for tests regarding disparities for age (defined as above or below 65 years) in the simulation study. The four tests are the likelihood ratio test (LRT), normal approximation, proportional reporting ratio (PRR), and reporting odds ratio methods while using the Benjamini-Hochberg (BH) method for adjustment of multiple testing under different parameter settings. The simulation takes counts from 250 random AEs from each  $n_i$ . size category and randomly assigns 20% of drugs from each AE to follow a proportion that differs from the null hypothesis proportion by a value of  $\Delta$ .

|             | $n_i$ . size | $\Delta$ | LRT     | Normal approx. | PRR     | ROR     |
|-------------|--------------|----------|---------|----------------|---------|---------|
| Sensitivity | small        | 0.0250   | 0.00829 | 0.0119         | 0.0202  | 0.0166  |
|             | small        | 0.05     | 0.0169  | 0.0250         | 0.0220  | 0.0243  |
|             | small        | 0.1      | 0.0664  | 0.0879         | 0.0536  | 0.0769  |
|             | small        | 0.2      | 0.297   | 0.346          | 0.209   | 0.324   |
|             | medium       | 0.025    | 0.00648 | 0.0102         | 0.0140  | 0.0114  |
|             | medium       | 0.05     | 0.0175  | 0.0268         | 0.0160  | 0.0188  |
|             | medium       | 0.1      | 0.0838  | 0.112          | 0.0553  | 0.0790  |
|             | medium       | 0.2      | 0.367   | 0.427          | 0.253   | 0.373   |
|             | large        | 0.025    | 0.00344 | 0.00531        | 0.00773 | 0.00595 |
|             | large        | 0.05     | 0.0183  | 0.0252         | 0.0146  | 0.0174  |
|             | large        | 0.1      | 0.0986  | 0.124          | 0.0616  | 0.0889  |
|             | large        | 0.2      | 0.396   | 0.455          | 0.242   | 0.394   |
|             | FDR          | small    | 0.025   | 0.0301         | 0.036   | 0.130   |
| small       |              | 0.05     | 0.0300  | 0.0361         | 0.130   | 0.0901  |
| small       |              | 0.1      | 0.0302  | 0.0362         | 0.128   | 0.0889  |
| small       |              | 0.2      | 0.0296  | 0.0365         | 0.119   | 0.0826  |
| medium      |              | 0.025    | 0.0300  | 0.0351         | 0.169   | 0.114   |
| medium      |              | 0.05     | 0.0301  | 0.0353         | 0.168   | 0.112   |
| medium      |              | 0.1      | 0.0299  | 0.0354         | 0.163   | 0.107   |
| medium      |              | 0.2      | 0.0299  | 0.0359         | 0.143   | 0.0913  |
| large       |              | 0.025    | 0.0362  | 0.0367         | 0.373   | 0.242   |
| large       |              | 0.05     | 0.0340  | 0.0361         | 0.358   | 0.225   |
| large       |              | 0.1      | 0.0317  | 0.0350         | 0.300   | 0.172   |
| large       |              | 0.2      | 0.0308  | 0.0359         | 0.206   | 0.104   |

Table A.4: Sensitivity and false discovery rate (FDR) for tests regarding disparities for age (defined as above or below 65 years) in the simulation study. The four tests are the likelihood ratio test (LRT), normal approximation, proportional reporting ratio (PRR), and reporting odds ratio methods while using the Max-Stat method for adjustment of multiple testing under different parameter settings. The simulation takes counts from 250 random AEs from each  $n_i$ . size category and randomly assigns 20% of drugs from each AE to follow a proportion that differs from the null hypothesis proportion by a value of  $\Delta$ .

|             | $n_i$ . size | $\Delta$ | LRT     | Normal approx. | PRR     | ROR     |
|-------------|--------------|----------|---------|----------------|---------|---------|
| Sensitivity | small        | 0.025    | 0.00935 | 0.0113         | 0.0187  | 0.0151  |
|             | small        | 0.05     | 0.0189  | 0.0238         | 0.0202  | 0.0221  |
|             | small        | 0.1      | 0.0710  | 0.0845         | 0.0494  | 0.0712  |
|             | small        | 0.2      | 0.303   | 0.332          | 0.194   | 0.305   |
|             | medium       | 0.025    | 0.00725 | 0.00964        | 0.0124  | 0.0101  |
|             | medium       | 0.05     | 0.0184  | 0.0253         | 0.0139  | 0.0164  |
|             | medium       | 0.1      | 0.0846  | 0.105          | 0.0480  | 0.0703  |
|             | medium       | 0.2      | 0.353   | 0.389          | 0.222   | 0.329   |
|             | large        | 0.025    | 0.0032  | 0.00476        | 0.00621 | 0.00501 |
|             | large        | 0.05     | 0.0158  | 0.0212         | 0.0111  | 0.0138  |
|             | large        | 0.1      | 0.0791  | 0.0966         | 0.0464  | 0.0664  |
|             | large        | 0.2      | 0.300   | 0.341          | 0.173   | 0.278   |
| FDR         | small        | 0.025    | 0.0383  | 0.0356         | 0.129   | 0.0893  |
|             | small        | 0.05     | 0.0381  | 0.0352         | 0.129   | 0.0887  |
|             | small        | 0.1      | 0.0367  | 0.0337         | 0.127   | 0.0861  |
|             | small        | 0.2      | 0.0308  | 0.0279         | 0.115   | 0.0724  |
|             | medium       | 0.025    | 0.0380  | 0.0344         | 0.167   | 0.113   |
|             | medium       | 0.05     | 0.0378  | 0.0340         | 0.166   | 0.111   |
|             | medium       | 0.1      | 0.0352  | 0.0310         | 0.159   | 0.104   |
|             | medium       | 0.2      | 0.0253  | 0.0220         | 0.133   | 0.0756  |
|             | large        | 0.025    | 0.0387  | 0.0355         | 0.368   | 0.239   |
|             | large        | 0.05     | 0.0359  | 0.0320         | 0.353   | 0.222   |
|             | large        | 0.1      | 0.0270  | 0.0225         | 0.291   | 0.162   |
|             | large        | 0.2      | 0.0132  | 0.0104         | 0.184   | 0.0730  |

Table A.5: The  $2 \times 3$  table for the event counts of drug  $j$  and a host factor given a specific AE  $i$ , where (1) denotes Group 1, (2) denotes Group 2, and (3) denotes Group 3 based on a host factor.

|             | Group 1                    | Group 2                    | Group 3                    | Total          |
|-------------|----------------------------|----------------------------|----------------------------|----------------|
| drug $j$    | $n_{ij}^{(1)}$             | $n_{ij}^{(2)}$             | $n_{ij}^{(3)}$             | $n_{ij}$       |
| no drug $j$ | $n_i^{(1)} - n_{ij}^{(1)}$ | $n_i^{(2)} - n_{ij}^{(2)}$ | $n_i^{(3)} - n_{ij}^{(3)}$ | $n_i - n_{ij}$ |
| Total       | $n_i^{(1)}$                | $n_i^{(2)}$                | $n_i^{(3)}$                | $n_i$          |

## An example for host factors with more than two levels

It is straightforward to extend the likelihood ratio test to situations where the host factor has more than two levels. The key is to use the multinomial distribution instead of the binomial distribution. Here, we illustrate it with an example for which the host factor has three levels. Table A.5 is similar to Table 2 except that there are now three groups for the host factor. Again, we denote  $n_{ij}^{(s)}$  to be the number of reports for the  $i$ th AE and the  $j$ th drug regarding patients of the host factor group  $s$  ( $s = 1, 2, 3$  for Groups 1, 2, and 3 respectively). Assume that  $n_{ij}^{(s)}$  follows a Poisson( $\mu_{ij}^{(s)}$ ) distribution with  $\mu_{ij}^{(s)} = \lambda_{ij}^{(s)} E_{ij}^{(s)}$  and  $E_{ij}^{(s)} = n_{i.}^{(s)} n_{ij} / n_{i.}$ . The global hypothesis is thus  $H_0 : \lambda_{ij}^{(1)} = \lambda_{ij}^{(2)} = \lambda_{ij}^{(3)} = 1$  for all  $j$ , versus  $H_a : \lambda_{ij}^{(s)} \neq 1$  for at least one  $j$  and  $s$ . We can show that under the null hypothesis and conditioning on row and column totals,

$$n_{ij}^{(s)} | n_{ij}, n_{i.}^{(s)}, n_{i.} \sim \text{multinomial} \left( n_{ij}, \frac{n_{i.}^{(s)}}{n_{i.}} \right).$$

Note  $n_{ij}^{(1)} + n_{ij}^{(2)} + n_{ij}^{(3)} = n_{ij}$ . Correspondingly, we can derive the log likelihood ratio statistic as

$$\begin{aligned} LR_{ij} &= -\log \left( \frac{\max_{H_0} L(\lambda)}{\max_{H_a} L(\lambda)} \right) \\ &= -n_{ij} \log \left( \frac{n_{ij}}{n_{i.}} \right) + n_{ij}^{(1)} \log \left( \frac{n_{ij}^{(1)}}{n_{i.}^{(1)}} \right) + n_{ij}^{(2)} \log \left( \frac{n_{ij}^{(2)}}{n_{i.}^{(2)}} \right) + n_{ij}^{(3)} \log \left( \frac{n_{ij}^{(3)}}{n_{i.}^{(3)}} \right). \end{aligned}$$

The p-value for the LR statistic can be computed using Monte Carlo simulations as described previously.
